# Down-regulated *GDF9* and *BMP15* mRNAs are the important determining factors for the unexplained female infertility cases advised for assisted reproductive technology

Sumita Dutta Gupta,<sup>1,2,6</sup> Sharbadeb Kundu,<sup>2</sup> Bishal Dhar,<sup>3</sup> Nabarun Das,<sup>4</sup> Arun Paul Choudhury,<sup>5</sup> Monica Deb,<sup>6,7</sup> Abhijit Das,<sup>8</sup> Amrita Das,<sup>5,9</sup> Nayanika Das,<sup>10</sup> Biswadeep Choudhury,<sup>11</sup> Alex C Varghese,<sup>12,13</sup> Kushal Kumar Kar,<sup>12</sup> Yashmin Choudhury,<sup>2</sup> Sankar Kumar Ghosh,<sup>2,3\*</sup>

<sup>1</sup> Department of Pathology, Silchar Medical College & Hospital, Silchar, 788 014, Assam, India

<sup>2</sup> Department of Biotechnology, Assam University, Silchar, 788 011, Assam, India

<sup>3</sup> University of Kalyani, Nadia, 741 235, West Bengal, India

<sup>4</sup> Department of Radiology, Silchar Medical College & Hospital, Silchar, 788 014, Assam, India

<sup>5</sup> Department of Obstetrics and Gynaecology, Silchar Medical College & Hospital, Silchar, 788 014, Assam, India

<sup>6</sup> Ultrapath Diagnostic and Research Centre, Silchar, 788 005, Assam, India

<sup>7</sup> Medinova Hospital, Silchar, 788 015, Assam, India

<sup>8</sup> Department of Anaesthesiology, Silchar Medical College & Hospital, Silchar, 788 014, Assam, India

<sup>9</sup> Benison IVF and Health care, Dwarka Mor, Sewak Park, 110 059, Delhi, India

<sup>10</sup> Department of Biotechnology, Gurucharan College, Silchar, 788 004, Assam, India

<sup>11</sup> Department of Biochemistry, Silchar Medical College & Hospital, Silchar, 788 014, Assam, India

<sup>12</sup> Mediland Fertility & Test Tube Baby Centre, Mediland Hospital and Research Centre, Silchar, 788 002, Assam, India

<sup>13</sup> ASTRA Fertility Group, 4303, Village Centre Court, Mississauga, ON L4Z 1S2, Canada

**\* Corresponding Author**

## DISCLAIMER

The authors have withdrawn this manuscript because they intend to revise this version of pre-print substantially in response to comments received from the reviewers and other peers on some analytical parts along with the interpretation of corresponding results, in order to make a fresh submission to an impacted reputed journal. Therefore, the authors do not wish this work to be cited as reference for the project. If you have any questions, please contact the corresponding author.
